# Supplementary material for: Notch and MAML-1 Complexation Do Not Detectably Alter the DNA Binding Specificity of the Transcription Factor CSL
Source: PLOS journal article supplement (doi:10.1371/journal.pone.0015034), 2010-11-24
Supplement: S1 (10.1371/journal.pone.0015034.s001) [file journal.pone.0015034.s001]

**Supplementary Information for: Notch and MAML-1 complexation do not detectably alter the DNA binding specificity of the transcription factor CSL**

Cristina Del Bianco<sup>1,2</sup>, Anastasia Vedenko<sup>3</sup>, Sung Hee Choi<sup>1</sup>, Michael F. Berger<sup>3,5,6</sup>, Leila Shokri<sup>3</sup>, Martha L. Bulyk<sup>3-5,7</sup>, and Stephen C. Blacklow<sup>1,4,5,7,8</sup>

<sup>1</sup>Department of Biological Chemistry and Molecular Pharmacology and Department of Pathology, Harvard Medical School, Boston, MA 02115

<sup>2</sup>Current Address: Cibio Centro Interdipartimentale Biologia Integrata, University of Trento, Trento, IT

<sup>3</sup>Departments of Medicine and <sup>4</sup>Pathology, Harvard Medical School and Brigham and Women's Hospital, Boston, MA 02115

<sup>5</sup>Committee on Higher Degrees in Biophysics, Harvard University, Cambridge, MA 02138

<sup>6</sup>Current Address: The Broad Institute of MIT and Harvard, Cambridge, MA, 02142

<sup>7</sup>Division of Health Sciences & Technology, Harvard Medical School, Boston, MA 02115

<sup>8</sup>Dana Farber Cancer Institute, Department of Cancer Biology, Boston, MA 02115

Address correspondence to S.C.B.: [sblacklow@partners.org](mailto:sblacklow@partners.org) and M.L.B. at [mlbulyk@receptor.med.harvard.edu](mailto:mlbulyk@receptor.med.harvard.edu)

**Figure S1. Notch 4 does not detectably alter the DNA binding-site preferences of CSL-His<sub>6</sub>.** DNA binding specificity motifs and 8-mer PBM enrichment scores were calculated for complexes comprised of A) CSL-His<sub>6</sub> and GST-Notch2, B) CSL-His<sub>6</sub> and GST-Notch4 and C) an empty chamber as a negative control. Motifs were derived using the Seed-and-Wobble algorithm as previously described [20,31].

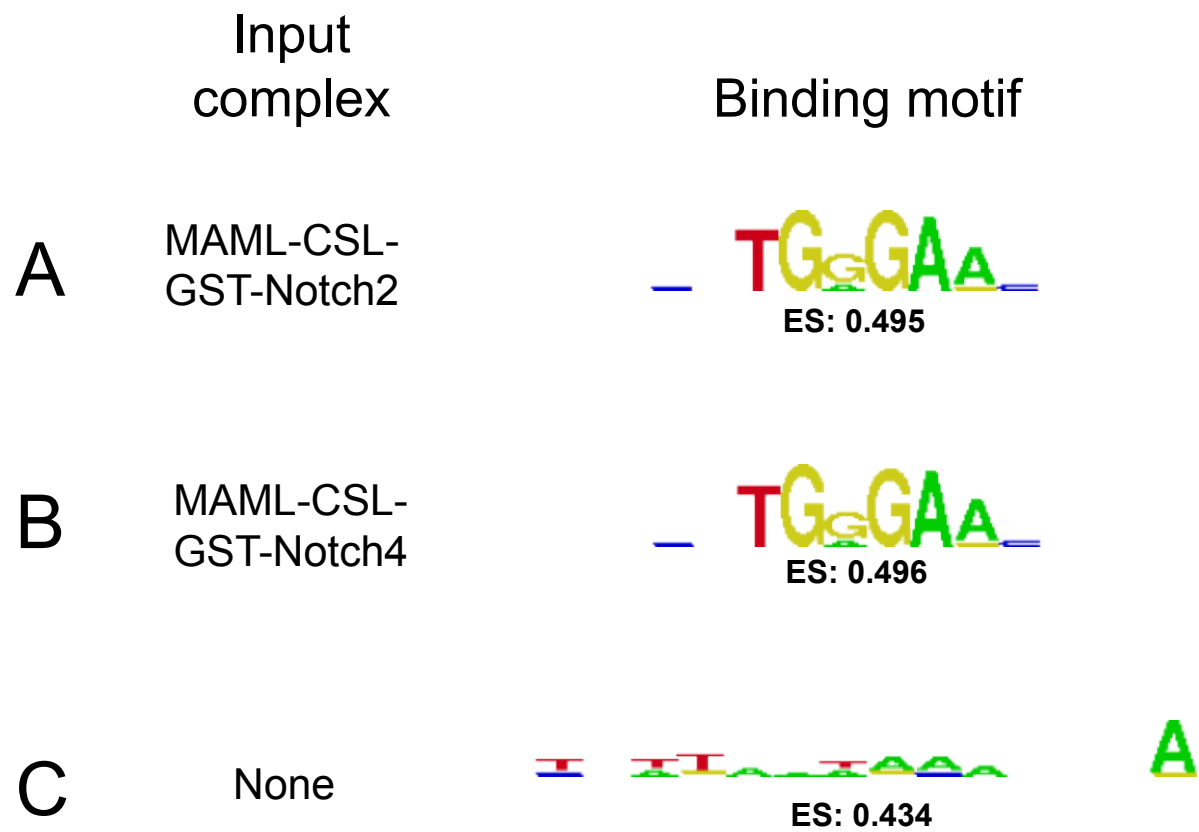

Figure S1
